# Supplementary material for: Hydrogen bond networks determine emergent mechanical and thermodynamic properties across a protein family
Source: PubMed Central journal article supplement (PMC2533333; doi:10.1186/1752-153x-2-17), 2008-08-12
Supplement: 1752-153X-2-17-S1.pdf [file 1752-153X-2-17-S1.pdf]

Experimental data: **NATIVE STRUCTURE + HEAT CAPACITY**

Simulated annealing over  **$u, v, \delta_{\text{nat}}$**

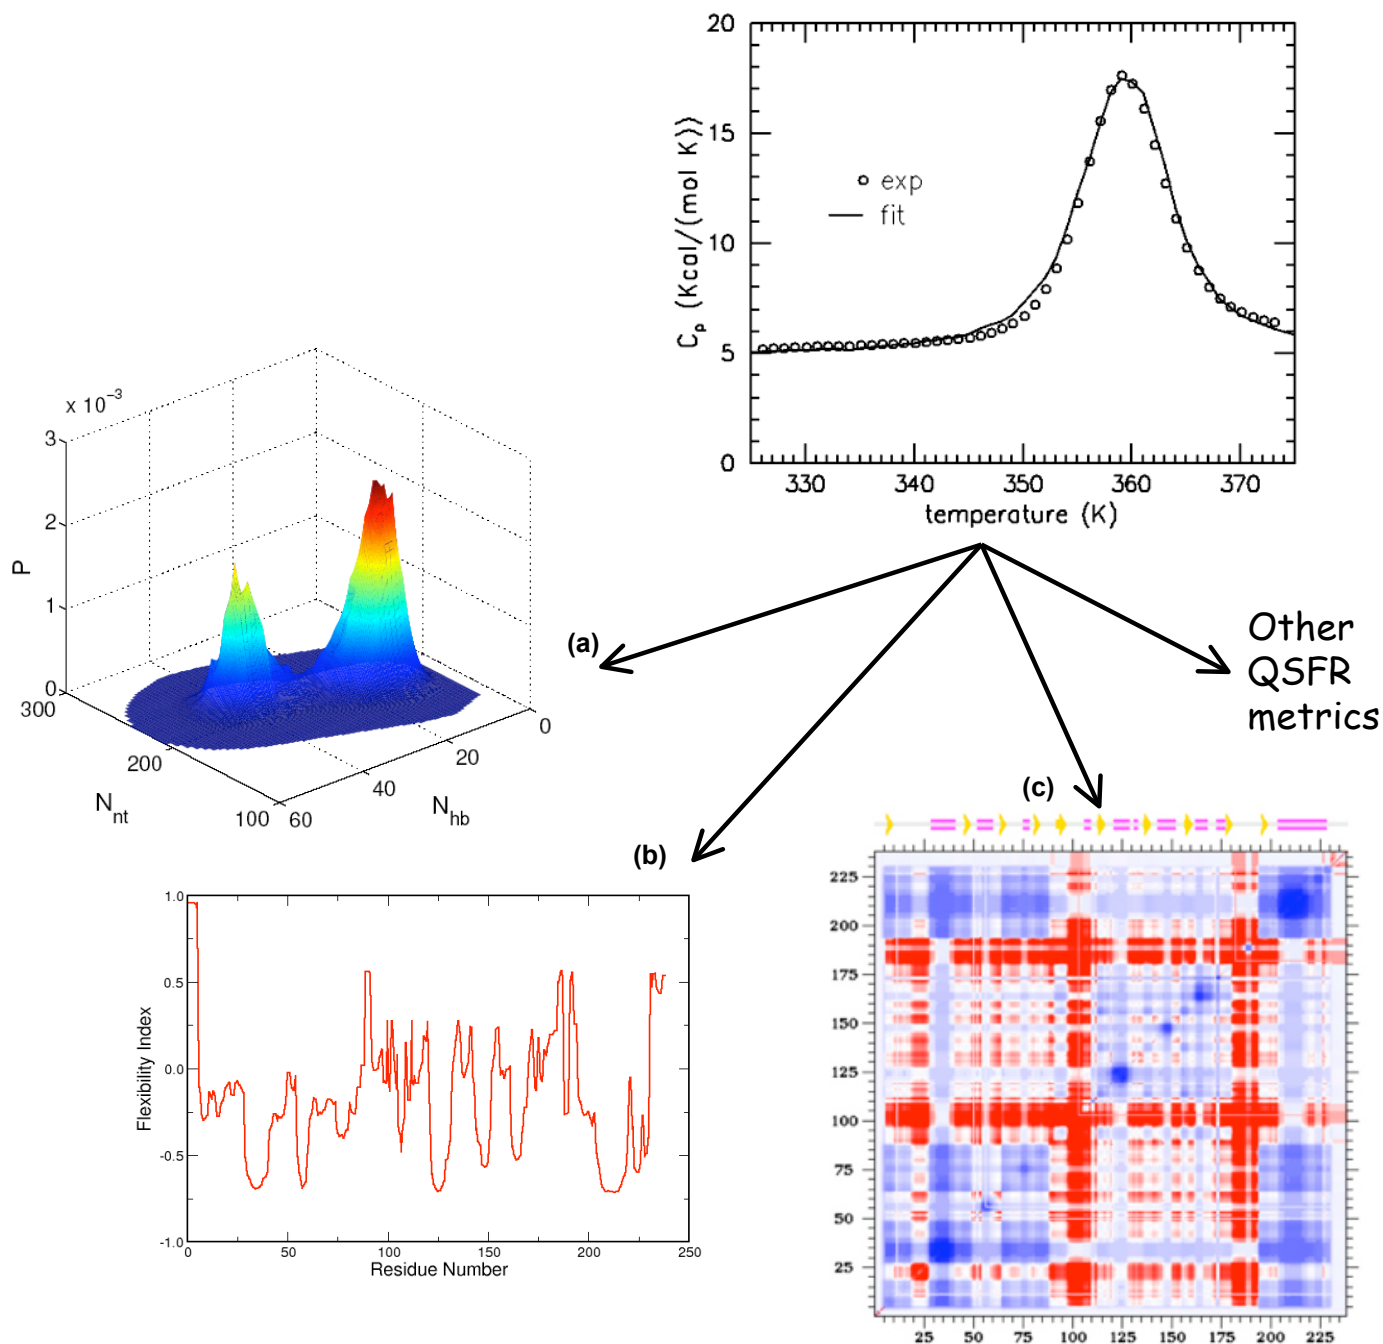

**Supplementary Figure 1:** A generic description of the workflow used by the mDCM. The mDCM begins with two pieces of input: (i.) the native structure of a protein and (ii.) an experimental heat capacity curve. A simulated annealing process is used to parameterize the model. With mDCM parameters in hand, a large number of mechanical and thermodynamic QSFR metrics can be computed. Three common examples are provided: (a) the free energy landscape (expressed here as probabilities), (b) backbone flexibility, and (c) cooperativity correlation. In the latter two cases, the values represent the thermodynamic average over the full ensemble; however, the mDCM also allows the user to average only specific sub-ensembles (i.e. the native basin only).
